# Supplementary material for: A social-semantic-working-memory account for two canonical language areas
Source: Research Square preprint supplement (doi:10.21203/rs.3.rs-2537489/v1), 2023-02-17
Supplement: Supplementary file 1 [file 20441f8bd4c850bfaab69d74.docx]

# Section A: Supplemental fMRI results

## Results of the character-list conditions of Experiment 1

We included the high-socialness and nonsocial character-list (HSCL and NSCL) conditions as two supplementary baseline conditions. The results using these baseline conditions are shown in Figure S1 and Table S1. The result patterns are similar to those found using the word-list baselines. In both the whole-brain and ROI results, an interaction between sentence and socialness effects was found in both the left vTPJ and lATL; both regions showed stronger activity in the HSS condition than in the HSCL condition but did not show stronger activity in the NSS condition than in the NSCL condition.

**Figure S1**

*Examination of the sensitivity of the left vTPJ and lATL to high-socialness and nonsocial sentences using character-list baseline conditions (Experiment 1).*


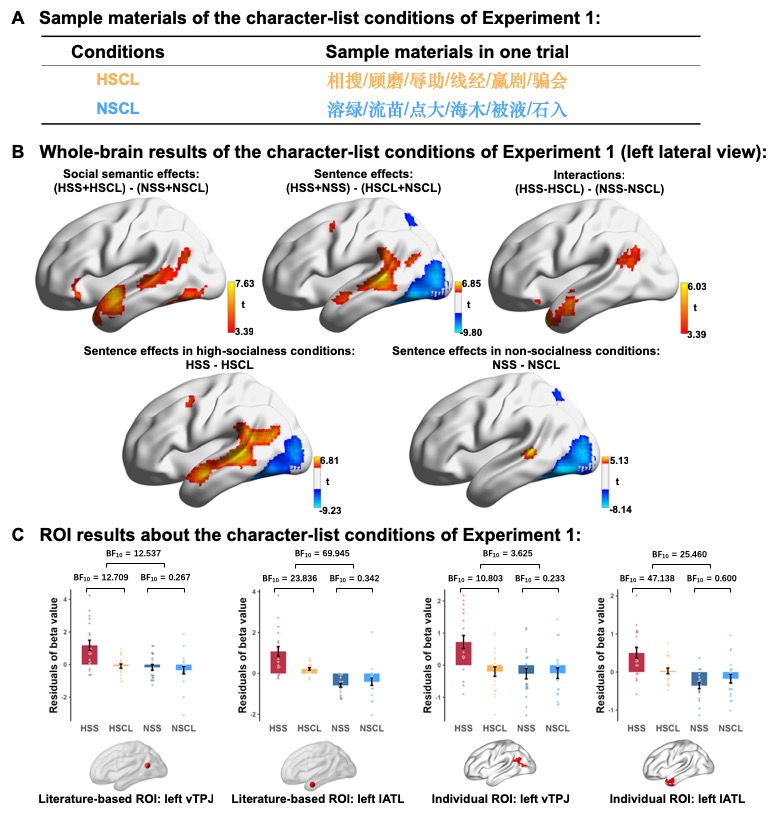


Panel A: The sample materials of the character-list conditions. For each trial, the stimuli were 6 character pairs that did not form words. Slashes indicate the boundaries of character pairs.

Panel B: The left lateral view of the whole-brain results (for the full results, see Table S1). Interaction between social-semantic and sentence effects was found in the left vTPJ and lATL. The left vTPJ and lATL showed stronger activation to sentences than to character lists in the high-socialness conditions (HSS vs. HSCL) but not in the nonsocial conditions (NSS vs. NSCL).

Panel C: The ROI results (for the results of classical parametric tests, see Table S7 and Table S8). The two bar graphs on the left side show the results in the ROIs defined based on a meta-analysis for the contrast between sentences and word lists (Zaccarella et al., 2017). The two bar graphs on the right side show the results in the ROIs defined based on the contrast between sentences and character lists on half of individual data. The bars show the mean residuals of the beta values with the IES being regressed out, the errorbars show standard errors, and each point shows the data of a participant. The brain maps at the bottom of the bar graphs show the locations of the literature-based ROIs and the group-constrained masks for individual ROIs. All ROIs show strong sentence effect in high-socialness conditions, no sentence effect in low-socialness conditions, and interaction between social-semantic and sentence effects.

Abbreviations: HSS = high-socialness sentence, HSCL = high-socialness character list, NSS = nonsocial sentence, NSCL = nonsocial character list.

**Table S1**

*Whole-brain results of the character-list conditions of Experiment 1 (voxel-wise p <.001, cluster-wise FWE p <.05).*

| Contrasts | Anatomical region of the peak voxel | Number of voxels | MNI coordinates of the peak voxel | | | Peak t value |
| --- | --- | --- | --- | --- | --- | --- |
|  |  |  | x | t | z |  |
| Social-semantic effect:  (HSS+HSCL) > (NSS+NSCL) | |  |  |  |  |  |
|  | Left Anterior Superior Temporal Gyrus | 468 | -57 | -3 | -9 | 7.625 |
|  | Left Lateral Inferior Occipital Cortex | 193 | -45 | -69 | -12 | 5.32 |
|  | Right Anterior Superior Temporal Gyrus | 106 | 54 | 3 | -15 | 5.907 |
|  | Left Posterior Superior Temporal Gyrus | 430 | -60 | -33 | 3 | 5.528 |
| (HSS+HSCL) < (NSS+NSCL) | |  |  |  |  |  |
|  | None | - | - | - | - | - |
| Sentence effect:  (HSS+NSS) > (HSCL+NSCL) | |  |  |  |  |  |
|  | Left Superior Temporal Gyrus | 770 | -54 | -42 | 3 | 6.840 |
|  | Left Occipital Pole | 105 | -9 | -96 | 9 | 5.691 |
|  | Right Occipital Pole | 121 | 12 | -90 | 18 | 5.592 |
|  | Right Lingual Gyrus | 118 | 9 | -69 | 0 | 5.109 |
|  | Left Anterior Superior Temporal Gyrus | 57 | -51 | -6 | -15 | 4.784 |
|  | Left Precuneous Cortex | 138 | -6 | -63 | 42 | 4.371 |
|  | Left Middle Frontal Gyrus | 40 | -45 | 3 | 57 | 4.093 |
| (HSS+NSS) < (HSCL+NSCL) | |  |  |  |  |  |
|  | Right Lateral Inferior Occipital Cortex | 889 | 42 | -69 | -6 | 9.795 |
|  | Left Occipital Pole | 947 | -36 | -90 | 9 | 9.116 |
|  | Right precentral Gyrus | 435 | 45 | 9 | 30 | 6.530 |
|  | Right Superior Parietal Lobe | 127 | 27 | -54 | 51 | 6.350 |
|  | Right Superior Frontal Gyrus | 362 | 21 | 24 | 60 | 5.250 |
|  | Left Lateral Superior Occipital Cortex | 49 | -24 | -66 | 54 | 4.958 |
| Interaction:  (HSS-HSCL) > (NSS-NSCL) | |  |  |  |  |  |
|  | Left Temporal Pole | 260 | -42 | 18 | -33 | 6.024 |
|  | Left Paracingulate Gyrus | 89 | -3 | 36 | -12 | 5.220 |
|  | Left Supramarginal Gyrus | 205 | -63 | -48 | 18 | 4.460 |
|  | Right Lateral Superior Occipital Cortex | 46 | 57 | -60 | 18 | 4.382 |
| (HSS-HSCL) < (NSS-NSCL) | |  |  |  |  |  |
|  | None | - | - | - | - | - |
| Simple effects:  HSS > HSCL | |  |  |  |  |  |
|  | Left Posterior Superior Temporal Gyrus | 1194 | -54 | -39 | 3 | 6.804 |
|  | Left Occipital Pole | 241 | -9 | -96 | 9 | 5.702 |
|  | Right Supramarginal Gyrus | 178 | 63 | -42 | 12 | 5.334 |
|  | Left Precuneous Cortex | 415 | -6 | -57 | 39 | 5.173 |
|  | Right Anterior Superior Temporal Gyrus | 60 | 57 | 0 | -15 | 4.942 |
|  | Left Middle Frontal Gyrus | 65 | -39 | 6 | 48 | 4.655 |
| HSS < HSCL | |  |  |  |  |  |
|  | Right Lateral Inferior Occipital Cortex | 749 | 42 | -69 | -6 | 9.228 |
|  | Left Occipital Pole | 731 | -36 | -90 | 9 | 7.359 |
|  | Right Precentral Gyrus | 123 | 45 | 9 | 27 | 5.985 |
|  | Right Lateral Superior Cortex | 88 | 27 | -57 | 54 | 5.611 |
|  | Right Superior Frontal Gyrus | 66 | 21 | 18 | 66 | 5.058 |
|  | Right Paracingulate Gyrus | 141 | 6 | 33 | 36 | 4.714 |
|  | Right Frontal Pole | 143 | 42 | 39 | 15 | 4.143 |
| NSS > NSCL | |  |  |  |  |  |
|  | Left Posterior Superior Temporal Gyrus | 84 | -51 | -39 | 6 | 5.127 |
|  | Right Cuneal Cortex | 45 | 12 | -87 | 21 | 4.488 |
| NSS < NSCL | |  |  |  |  |  |
|  | Left Lateral Inferior Occipital Cortex | 829 | -45 | -69 | -12 | 8.133 |
|  | Right Inferior Temporal Gyrus | 728 | 45 | -60 | -12 | 8.018 |
|  | Right Superior Parietal Cortex | 96 | 24 | -51 | 48 | 5.346 |
|  | Right Precentral Gyrus | 195 | 45 | 9 | 30 | 5.277 |
|  | Left Inferior Parietal Cortex | 44 | -24 | -66 | 54 | 4.942 |
|  | Right Superior Frontal Gyrus | 137 | 21 | 27 | 60 | 4.600 |

*Note*. Condition labels: HSS = high-socialness-sentence, HSCL = high-socialness-character-list, NSS = nonsocial-sentence, NSCL = nonsocial-character-list.

## Supplemental information of the whole-brain results described in the main text

**Table S2**

*Whole-brain results of Experiment 1 (voxel-wise p <.001, cluster-wise FWE p <.05).*

| Contrasts | Anatomical region of the peak voxel | Number of voxels | MNI coordinates of the peak voxel | | | Peak t value |
| --- | --- | --- | --- | --- | --- | --- |
|  |  |  | x | t | z |  |
| Social-semantic effect:  (HSS+HSWL) > (NSS+NSWL) | |  |  |  |  |  |
|  | Left Anterior Superior Temporal Gyrus | 915 | -57 | -3 | -9 | 7.76 |
|  | Right Anterior Superior Temporal Gyrus | 110 | 54 | 0 | -15 | 5.85 |
|  | Left Inferior Lateral Occipital Cortex | 64 | -39 | -78 | -9 | 4.529 |
| (HSS+HSWL) < (NSS+NSWL) | | |  |  |  |  |
|  | None | - | - | - | - | - |
| Sentence effect:  (HSS+NSS) > (HSWL+NSWL) | |  |  |  |  |  |
|  | Left Anterior Superior Temporal Gyrus | 2384 | -51 | -42 | 6 | 10.264 |
|  | Right Temporal Pole | 55 | 57 | 12 | -12 | 5.438 |
| (HSS+NSS) < (HSWL+NSWL) | |  |  |  |  |  |
|  | Right Superior Frontal Gyrus | 116 | 18 | 18 | 63 | 5.877 |
|  | Cingulate Gyrus | 119 | 3 | -24 | 39 | 4.642 |
|  | Right Paracingulate Gyrus | 189 | 6 | 51 | 18 | 4.348 |
|  | Right Lateral Inferior Occipital Cortex | 62 | 24 | -78 | 12 | 4.339 |
|  | Right Paracingulate Gyrus | 60 | 6 | 24 | 36 | 3.992 |
| Interaction:  (HSS-HSWL) > (NSS-NSWL) | |  |  |  |  |  |
|  | Left Anterior Middle Temporal Gyrus | 258 | -63 | -6 | -21 | 6.009 |
|  | Cingulate Gyrus | 134 | 0 | -54 | 24 | 4.732 |
|  | Right Angular Gyrus | 62 | 63 | -54 | 15 | 4.712 |
|  | Medial Frontal Gyrus | 47 | 0 | 51 | -9 | 4.636 |
|  | Thalamus | 51 | -12 | -33 | 6 | 4.513 |
|  | Left Supramarginal Gyrus | 137 | -51 | -48 | 18 | 4.229 |
|  | Left Frontal Pole | 43 | -12 | 48 | 45 | 4.098 |
| (HSS-HSWL) < (NSS-NSWL) | |  |  |  |  |  |
|  | None | - | - | - | - | - |
| Simple effects:  HSS > HSWL | |  |  |  |  |  |
|  | Left Posterior Superior Temporal Gyrus | 2543 | -54 | -42 | 3 | 9.480 |
|  | Right Temporal Pole | 98 | 60 | 9 | -12 | 6.000 |
|  | Right Cerebellum | 54 | 15 | -72 | -27 | 5.869 |
|  | Right Angular Gyrus | 201 | 66 | -48 | 15 | 5.194 |
|  | Amygdala | 61 | -24 | -9 | -18 | 4.438 |
| HSS < HSWL | |  |  |  |  |  |
|  | Right Superior Frontal Gyrus | 86 | 18 | 18 | 63 | 6.218 |
|  | Right Frontal Pole | 57 | 27 | 60 | 21 | 4.407 |
|  | Right Paracingulate Gyrus | 49 | 9 | 30 | 30 | 4.060 |
| NSS > NSWL | |  |  |  |  |  |
|  | Left Posterior Superior Temporal Gyrus | 342 | -51 | -42 | 6 | 7.213 |
|  | Left Inferior Frontal Gyrus | 413 | -48 | 15 | 21 | 5.805 |
|  | Left Lateral Superior Occipital Cortex | 192 | -33 | -60 | 39 | 5.117 |
| NSS < NSWL | |  |  |  |  |  |
|  | Left Medial Superior Frontal Cortex | 238 | 0 | 57 | 12 | 5.168 |
|  | Thalamus | 92 | 15 | -36 | 9 | 4.705 |

*Note*. Condition labels: HSS = high-socialness sentence, HSWL = high-socialness word list, NSS = nonsocial sentence, NSWL = nonsocial word list.

**Table S3**

*Whole-brain results of Experiment 2 (voxel-wise p <.001, cluster-wise FWE p <.05).*

| Contrasts | Anatomical region of the peak voxel | Number of voxels | MNI coordinates of the peak voxel | | | Peak t value |
| --- | --- | --- | --- | --- | --- | --- |
|  |  |  | x | t | z |  |
| Social-semantic effect:  (HSS+HSWL) > (NSS+NSWL) | |  |  |  |  |  |
|  | Left Anterior Superior Temporal Gyrus | 373 | -54 | 0 | -15 | 8.76 |
|  | Left Angular Gyrus | 161 | -54 | -60 | 21 | 5.359 |
| (HSS+HSWL) < (NSS+NSWL) | |  |  |  |  |  |
|  | None | - | - | - | - | - |
| Sentence effect:  (HSS+NSS) > (HSWL+NSWL) | |  |  |  |  |  |
|  | Left Temporal Pole | 205 | -54 | 6 | -15 | 7.152 |
|  | Left Frontal Orbital Cortex | 183 | -42 | 30 | -9 | 6.887 |
|  | Left Posterior Middle Temporal Gyrus | 592 | -54 | -39 | -3 | 6.222 |
| (HSS+NSS) < (HSWL+NSWL) | |  |  |  |  |  |
|  | Right Middle Frontal Gyrus | 824 | 39 | 33 | 39 | 5.919 |
|  | Right Paracingulate Gyrus | 321 | 6 | 24 | 42 | 5.279 |
|  | Right Superior Parietal Lobule | 457 | 42 | -48 | 54 | 5.115 |
|  | Left Frontal Pole | 59 | -33 | 51 | 18 | 4.821 |
| Interaction:  (HSS-HSWL) > (NSS-NSWL) | |  |  |  |  |  |
|  | Left Superior Lateral Occipital Cortex | 57 | -54 | -63 | 27 | 4.79 |
| (HSS-HSWL) < (NSS-NSWL) | |  |  |  |  |  |
|  | None | - | - | - | - | - |
| Simple effects:  HSS > HSWL | |  |  |  |  |  |
|  | Left Superior Lateral Occipital Cortex | 492 | -51 | -63 | 21 | 6.672 |
|  | Left Medial Superior Frontal Cortex | 105 | -9 | 54 | 36 | 6.641 |
|  | Left Frontal Orbital Cortex | 64 | -42 | 30 | -9 | 6.309 |
|  | Left Temporal Pole | 215 | -54 | 6 | -18 | 6.293 |
| HSS < HSWL | |  |  |  |  |  |
|  | Right Frontal Pole | 82 | 39 | 36 | 33 | 5.318 |
|  | Left Precuneus | 68 | -15 | -63 | 33 | 5.000 |
|  | Right Angular Gyrus | 113 | 45 | -48 | 54 | 4.815 |
|  | Right Inferior Frontal Gyrus, Opercular Part | 103 | 45 | 15 | 12 | 4.678 |
|  | Right Supplementary Motor Area | 144 | 6 | 15 | 51 | 4.421 |
| NSS > NSWL | |  |  |  |  |  |
|  | Left Posterior Superior Temporal Gyrus | 173 | -57 | -27 | 0 | 4.798 |
| NSS < NSWL | |  |  |  |  |  |
|  | Right Precentral Gyrus | 133 | 39 | 3 | 24 | 5.160 |
|  | Right Inferior Lateral Occipital Cortex | 77 | 27 | -78 | 6 | 4.644 |

*Note*. Condition labels: HSS = high-socialness sentence, HSWL = high-socialness word list, NSS = nonsocial sentence, NSWL = nonsocial word list.

**Table S4**

*Whole-brain results of Experiment 3 (encoding stage) (voxel-wise p <.001, cluster-wise FWE p <.05).*

| Contrasts | Anatomical region of the peak voxel | Number of voxels | MNI coordinates of the peak voxel | | | Peak t value |
| --- | --- | --- | --- | --- | --- | --- |
| x | y | z |
| Social-semantic effect:  (HSHML + HSLML) > (NSHML + NSLML) | | | | | | |
|  | Left Middle Temporal Gyrus | 1044 | -60 | -6 | -9 | 10.093 |
|  | Left Posterior Cingular Gyrus | 281 | -3 | -57 | 18 | 6.957 |
|  | Left Dorsal Medial Prefrontal Gyrus | 113 | -6 | 54 | 36 | 6.814 |
|  | Right Anterior Temporal Lobe | 251 | 54 | 0 | -18 | 6.592 |
|  | Right Inferior Occipital Gyrus | 355 | 42 | -75 | -3 | 6.559 |
|  | Left Inferior Occipital Gyrus | 295 | -42 | -72 | -9 | 6.050 |
|  | Right Middle Temporal Gyrus | 209 | 54 | -42 | 3 | 5.544 |
| (HSHML + HSLML) < (NSHML + NSLML) | | | | | | |
|  | Left Frontal Pole | 103 | -42 | 36 | 15 | 6.449 |
|  | Left Supramarginal Gyrus | 62 | -60 | -42 | 42 | 4.683 |
|  | Middle Cingulate | 67 | -6 | -30 | 42 | 4.482 |
| Memory load effect:  (HSHML + NSHML) > (HSLML + NSLML) | | | | | | |
|  | Left Calcarine | 4718 | -12 | -96 | -3 | 16.280 |
|  | Right Inferior Frontal Gyrus | 2849 | 36 | 21 | 9 | 9.766 |
|  | Thalamus | 740 | 3 | -27 | -6 | 7.148 |
|  | Medial Prefrontal cortex | 225 | 39 | 54 | 15 | 6.407 |
| (HSHML + NSHML) < (HSLML + NSLML) | | | | | | |
|  | Left Precuneus | 417 | -15 | -57 | 15 | 7.093 |
|  | Right Cuneus | 129 | 18 | -84 | 24 | 7.002 |
|  | Right Angular Gyrus | 256 | 51 | -66 | 27 | 6.592 |
|  | Left Precuneus | 50 | -6 | -51 | 57 | 5.043 |
| Interaction:  (HSHML - NSHML) > (HSLML - NSLML) | | | | | | |
|  | Posterior Cingulate Gyrus | 71 | 3 | -39 | 39 | 4.0714 |
| (HSHML - NSHML) < (HSLML - NSLML) | | | | | | |
|  | None | - | - | - | - | - |

Note. Condition labels: HSHML = high-socialness and high-memory-load, HSLML = high-socialness and low-memory-load, NSHML = nonsocial and high-memory-load, NSLML = nonsocial and low-memory-load.

**Table S5**

*Whole-brain results of Experiment 3 (maintenance stage) (voxel-wise p <.001, cluster-wise FWE p <.05).*

| Contrasts | Anatomical region of the peak voxel | | | Number of voxels | | MNI coordinates of the peak voxel | | | | | | Peak t value |
| --- | --- | --- | --- | --- | --- | --- | --- | --- | --- | --- | --- | --- |
| x | | y | | z | |
| Social-semantic effect:  (HSHML + HSLML) > (NSHML + NSLML) | | | | | | | | | | | | |
|  | Left Middle Temporal Gyrus | | | 188 | | -57 | | -9 | | -9 | | 8.158 |
|  | Left Temporoparietal Junction | | | 54 | | -48 | | -63 | | 21 | | 4.678 |
|  | Left Precuneus/Posterior Cingular Gyrus | | | 44 | | 0 | | -54 | | 15 | | 4.466 |
|  | Left Middle Temporal Gyrus | | | 62 | | -51 | | -27 | | -6 | | 4.337 |
| (HSHML + HSLML) < (NSHML + NSLML) | | | | | | | | | | | | |
|  | | None | - | | - | | - | | - | | - | |
| Memory load effect:  (HSHML + NSHML) > (HSLML + NSLML) | | | | | | | | | | | | |
|  | Left Prefrontal Cortex | | | 78 | | -42 | | 51 | | 6 | | 5.410 |
|  | Left Inferior Parietal Lobe | | | 71 | | -42 | | -54 | | 45 | | 4.805 |
|  | Left Middle Frontal Gyrus | | | 91 | | -36 | | 15 | | 54 | | 4.592 |
| (HSHML + NSHML) < (HSLML + NSLML) | | | | | | | | | | | | |
|  | Left Supplementary Motor Area | | | 286 | | -3 | | 3 | | 60 | | 8.315 |
|  | Left Precentral Gyrus | | | 97 | | -48 | | -3 | | 51 | | 6.550 |
|  | Right Putamen | | | 676 | | 21 | | 15 | | -9 | | 6.036 |
|  | Right Calcarine | | | 563 | | 18 | | -45 | | 6 | | 5.559 |
|  | Right Superior Occipital Gyrus | | | 333 | | 21 | | -87 | | 30 | | 5.072 |
|  | Left Middle Occipital Gyrus | | | 175 | | -36 | | -87 | | 0 | | 4.825 |
| Interaction:  (HSHML - NSHML) > (HSLML - NSLML) | | | | | | | | | | | | |
|  | | None | - | | - | | - | | - | | - | |
| (HSHML - NSHML) < (HSLML - NSLML) | | | | | | | | | | | | |
|  | | None | - | | - | | - | | - | | - | |

*Note*. Condition labels: HSHML = high-socialness and high-memory-load, HSLML = high-socialness and low-memory-load, NSHML = nonsocial and high-memory-load, NSLML = nonsocial and low-memory-load.

**Table S6**

*Whole-brain results of Experiment 5 (voxel-wise p <.001, cluster-wise FWE p <.05).*

| Contrasts | Anatomical region of the peak voxel | Number of voxels | MNI coordinates of the peak voxel | | | Peak t value |
| --- | --- | --- | --- | --- | --- | --- |
|  |  |  | x | t | z |  |
| HS > NS | |  |  |  |  |  |
|  | Right Posterior Middle Temporal Gyrus | 1915 | 54 | -60 | 9 | 14.585 |
|  | Left Dorsomedial Prefrontal Cortex | 729 | -6 | 57 | 30 | 12.845 |
|  | Left Posterior Middle Temporal Gyrus | 1781 | -48 | -63 | 9 | 11.461 |
|  | Left Hippocampus | 534 | -24 | -9 | -15 | 10.755 |
|  | Precuneous Cortex | 436 | 3 | -60 | 27 | 8.922 |
|  | Left Ventromedial Prefrontal Cortex | 58 | 3 | 48 | -15 | 7.909 |
|  | Right Precentral Gyrus | 360 | 36 | -9 | 66 | 7.562 |
|  | Left Middle Frontal Gyrus | 156 | -39 | 3 | 48 | 6.515 |
|  | Left Cerebellum | 71 | -33 | -81 | -33 | 6.300 |
|  | Right Superior Parietal Lobe | 47 | 36 | -45 | 66 | 5.540 |
|  | Left Putamen | 43 | -21 | 3 | 9 | 4.943 |
| HS < NS | |  |  |  |  |  |
|  | Left Supramarginal Gyrus | 50 | -60 | -33 | 48 | 5.662 |
| HS > SP | |  |  |  |  |  |
|  | Right Inferior Lateral Occipital Cortex | 1079 | 51 | -60 | 12 | 11.735 |
|  | Left Posterior Middle Temporal Gyrus | 871 | -48 | -63 | 9 | 9.829 |
|  | Precuneous Cortex | 556 | 6 | -60 | 21 | 8.843 |
|  | Right Anterior Superior Temporal Gyrus | 149 | 54 | 0 | -15 | 8.584 |
|  | Fusiform Cortex | 65 | 42 | -54 | -21 | 7.939 |
|  | Left Ventromedial Prefrontal Cortex | 169 | -6 | 51 | -9 | 7.006 |
|  | Left Dorsomedial Prefrontal Cortex | 86 | 6 | 60 | 15 | 5.446 |
| HS < SP | |  |  |  |  |  |
|  | None | - | - | - | - | - |
| SP > NS | |  |  |  |  |  |
|  | Left Posterior Middle Temporal Gyrus | 589 | -54 | -60 | 6 | 9.686 |
|  | Right Posterior Middle Temporal Gyrus | 645 | 57 | -60 | 9 | 9.376 |
|  | Left Dorsomedial Prefrontal Cortex | 167 | -9 | 36 | 54 | 6.756 |
|  | Left Frontal Orbital Cortex | 116 | -36 | 24 | -9 | 6.386 |
|  | Right Inferior Frontal Gyrus, Triangular Part | 69 | 45 | 21 | 21 | 5.673 |
|  | Left Temporal Lobe | 51 | -57 | 6 | -15 | 5.65 |
|  | Right Temporal Pole | 54 | 54 | 12 | -21 | 5.615 |
|  | Right Precentral Gyrus | 278 | 36 | -6 | 63 | 5.586 |
|  | Left Cerebellum | 51 | -15 | -51 | -21 | 5.493 |
| SP < NS | |  |  |  |  |  |
|  | Cingulate Gyrus | 74 | -18 | -30 | 33 | 5.533 |

*Note*. Condition labels: HS = high-socialness condition, SP = single-person condition, NS = nonsocial condition.

## ROI results of classical parametric tests in Experiments 1, 2, 3, 5 and 6

Classical parametric t-tests (two-tailed) were conducted as a supplementary statistic method for the ROI analysis in Experiments 1, 2, 3, 5 and 6. As a measure of effect size, Cohen's d was calculated for each contrast as the difference in means divided by the pooled standard deviations.

**Table S7**

*Literature-based ROI results of classical parametric tests in Experiment 1.*

| Contrast | Literature-based ROI: left vTPJ | | | | | Literature-based ROI: left lATL | | | | |
| --- | --- | --- | --- | --- | --- | --- | --- | --- | --- | --- |
| Differences | 95CI | Cohen d | t | p | Differences | 95CI | Cohen d | t | p |
| Social-semantic effects:  (HSS+HSWL) - (NSS+NSWL) | 1.67 (2.90) | [0.31, 3.03] | 0.576 | 2.583 | 0.018 | 2.27 (2.09) | [1.29, 3.25] | 1.086 | 4.844 | <.001 |
| (HSS+HSCL) - (NSS+NSCL) | 1.61 (2.08) | [0.64, 2.58] | 0.774 | 3.471 | 0.003 | 2.29 (1.82) | [1.44, 3.14] | 1.258 | 5.633 | <.001 |
| Sentence effects:  (HSS+NSS) - (HSWL+NSWL) | 1.60 (2.17) | [0.58, 2.62] | 0.737 | 3.297 | 0.004 | 0.79 (1.60) | [0.04, 1.54] | 0.494 | 2.206 | 0.04 |
| (HSS+NSS) - (HSCL+NSCL) | 1.45 (2.76) | [0.16, 2.74] | 0.525 | 2.347 | 0.030 | 0.69 (1.54) | [-0.03, 1.41] | 0.448 | 1.998 | 0.06 |
| Interaction:  (HSS-HSWL)-(NSS-NSWL) | 1.04 (1.15) | [0.50, 1.58] | 0.904 | 4.031 | <.001 | 1.06 (0.99) | [0.60, 1.52] | 1.071 | 4.776 | <.001 |
| Simple effects:  HSS-HSWL | 1.32 (1.35) | [0.69, 1.95] | 0.978 | 4.349 | <.001 | 0.92 (1.00) | [0.45, 1.39] | 0.920 | 4.134 | <.001 |
| NSS-NSWL | 0.28 (1.08) | [-0.23, 0.79] | 0.259 | 1.155 | 0.263 | -0.13 (0.88) | [-0.54, 0.28] | 0.148 | -0.678 | 0.506 |
| Interaction:  (HSS-HSCL) - (NSS-NSCL) | 1.10 (1.47) | [0.41, 1.79] | 0.748 | 3.337 | 0.003 | 1.03 (1.10) | [0.52, 1.54] | 0.936 | 4.208 | <.001 |
| Simple effects:  HSS - HSCL | 1.27 (1.70) | [0.47, 2.07] | 0.747 | 3.344 | 0.003 | 0.86 (1.05) | [0.37, 1.35] | 0.819 | 3.667 | 0.002 |
| NSS - NSCL | 0.18 (1.41) | [-0.48, 0.84] | 0.128 | 0.560 | 0.582 | -0.17 (0.83) | [-0.56, 0.22] | 0.205 | -0.933 | 0.362 |

*Note*. Degree of freedom was 19 for all contrasts. Differences in residuals of beta value are in the form of mean (standard deviation). Abbreviations: HSS = high-socialness sentence, HSWL = high-socialness word list, HSCL = high-socialness character list, NSS = nonsocial sentence, NSWL = nonsocial word list, NSCL = nonsocial character list, 95CI = 95% confidence interval.

**Table S8**

*Individual ROI results of classical parametric tests in Experiment 1.*

| Contrast | Individual ROI: left vTPJ | | | | | Individual ROI: left lATL | | | | |
| --- | --- | --- | --- | --- | --- | --- | --- | --- | --- | --- |
| Differences | 95CI | Cohen d | t | p | Differences | 95CI | Cohen d | t | p |
| Social-semantic effects:  (HSS+HSWL) - (NSS+NSWL) | 1.12 (1.88) | [0.24, 2.00] | 0.596 | 2.666 | 0.015 | 1.10 (1.53) | [0.38, 1.82] | 0.719 | 3.200 | 0.005 |
| (HSS+HSCL) - (NSS+NSCL) | 1.04 (1.44) | [0.37, 1.71] | 0.722 | 3.219 | 0.005 | 1.07 (1.39) | [0.42, 1.72] | 0.770 | 3.444 | 0.003 |
| Sentence effects:  (HSS+NSS) - (HSWL+NSWL) | 1.30 (1.94) | [0.39, 2.21] | 0.670 | 2.997 | 0.007 | 0.58 (0.97) | [0.13, 1.03] | 0.598 | 2.698 | 0.014 |
| (HSS+NSS) - (HSCL+NSCL) | 0.91 (1.97) | [-0.01, 1.83] | 0.462 | 2.059 | 0.053 | 0.29 (0.73) | [-0.05, 0.63] | 0.397 | 1.776 | 0.092 |
| Interaction:  (HSS-HSWL)-(NSS-NSWL) | 0.72 (1.19) | [0.16, 1.28] | 0.605 | 2.698 | 0.014 | 0.53 (0.65) | [0.23, 0.83] | 0.815 | 3.666 | 0.002 |
| Simple effects:  HSS-HSWL | 1.01 (1.25) | [0.42, 1.60] | 0.808 | 3.608 | 0.002 | 0.56 (0.57) | [0.29, 0.83] | 0.982 | 4.372 | <.001 |
| NSS-NSWL | 0.29 (1.01) | [-0.18, 0.76] | 0.287 | 1.291 | 0.212 | 0.03 (0.59) | [-0.25, 0.31] | 0.051 | 0.201 | 0.843 |
| Interaction:  (HSS-HSCL) - (NSS-NSCL) | 0.94 (1.58) | [0.20, 1.68] | 0.595 | 2.669 | 0.015 | 0.65 (0.79) | [0.28, 1.02] | 0.823 | 3.700 | 0.002 |
| Simple effects:  HSS - HSCL | 0.92 (1.27) | [0.33, 1.51] | 0.724 | 3.260 | 0.004 | 0.47 (0.53) | [0.22, 0.72] | 0.887 | 4.011 | 0.001 |
| NSS - NSCL | -0.02 (1.26) | [-0.61, 0.57] | 0.016 | -0.059 | 0.954 | -0.18 (0.55) | [-0.44, 0.08] | 0.327 | -1.488 | 0.153 |

*Note*. Degree of freedom was 19 for all contrasts. Differences in residuals of beta value are in the form of mean (standard deviation). Abbreviations: HSS = high-socialness sentence, HSWL = high-socialness word list, HSCL = high-socialness character list, NSS = nonsocial sentence, NSWL = nonsocial word list, NSCL = nonsocial character list, 95CI = 95% confidence interval.

**Table S9**

*Literature-based ROI results of classical parametric tests in Experiment 2.*

| Contrast | Literature-based ROI: left vTPJ | | | | | Literature-based ROI: left lATL | | | | |
| --- | --- | --- | --- | --- | --- | --- | --- | --- | --- | --- |
| Differences | 95CI | Cohen d | t | p | Differences | 95CI | Cohen d | t | p |
| Social-semantic effect:  (HSS+HSWL) - (NSS+NSWL) | 0.94 (1.30) | [0.33, 1.55] | 0.723 | 3.222 | 0.004 | 1.04 (0.86) | [0.64, 1.44] | 1.209 | 5.447 | <.001 |
| Sentence effect:  (HSS+NSS) - (HSWL+NSWL) | 1.29 (1.36) | [0.65, 1.93] | 0.949 | 4.215 | <.001 | 0.63 (0.81) | [0.25, 1.01] | 0.778 | 3.453 | 0.003 |
| Interaction:  (HSS-HSWL)-(NSS-NSWL) | 0.87 (1.61) | [0.12, 1.62] | 0.54 | 2.422 | 0.026 | 0.54 (0.89) | [0.12, 0.96] | 0.607 | 2.748 | 0.013 |
| Simple effects:  HSS-HSWL | 1.08 (1.23) | [0.50, 1.66] | 0.878 | 3.919 | 0.001 | 0.59 (0.47) | [0.37, 0.81] | 1.255 | 5.617 | <.001 |
| NSS-NSWL | 0.21 (0.84) | [-0.18, 0.60] | 0.250 | 1.096 | 0.287 | 0.04 (0.71) | [-0.29, 0.37] | 0.056 | 0.262 | 0.796 |

*Note*. Degree of freedom was 19 for all contrasts. Differences in residuals of beta value are in the form of mean (standard deviation). Abbreviations: HSS = high-socialness sentence, HSWL = high-socialness word list, NSS = nonsocial sentence, NSWL = nonsocial word list, 95CI = 95% confidence interval.

**Table S10**

*Individual ROI results of classical parametric tests in Experiment 2.*

| Contrast | Individual ROI: left vTPJ | | | | | Individual ROI: left lATL | | | | |
| --- | --- | --- | --- | --- | --- | --- | --- | --- | --- | --- |
| Differences | 95CI | Cohen d | t | p | Differences | 95CI | Cohen d | t | p |
| Social-semantic effect:  (HSS+HSWL) - (NSS+NSWL) | 0.63 (1.13) | [0.10, 1.16] | 0.558 | 2.491 | 0.022 | 0.63 (0.88) | [0.22, 1.04] | 0.716 | 3.166 | 0.005 |
| Sentence effect:  (HSS+NSS) - (HSWL+NSWL) | 0.81 (1.34) | [0.18, 1.44] | 0.604 | 2.709 | 0.014 | 0.53 (0.65) | [0.23, 0.83] | 0.815 | 3.662 | 0.002 |
| Interaction:  (HSS-HSWL)-(NSS-NSWL) | 0.94 (0.93) | [0.50, 1.38] | 1.011 | 4.498 | <.001 | 0.35 (0.67) | [0.04, 0.66] | 0.522 | 2.306 | 0.033 |
| Simple effects:  HSS-HSWL | 0.87 (0.73) | [0.53, 1.21] | 1.192 | 5.385 | <.001 | 0.44 (0.43) | [0.24, 0.64] | 1.023 | 4.554 | <.001 |
| NSS-NSWL | -0.06 (0.90) | [-0.48, 0.36] | 0.067 | -0.305 | 0.764 | 0.09 (0.50) | [-0.14, 0.32] | 0.180 | 0.823 | 0.421 |

*Note*. Degree of freedom was 19 for all contrasts. Differences in residuals of beta value are in the form of mean (standard deviation). Abbreviations: HSS = high-socialness sentence, HSWL = high-socialness word list, NSS = nonsocial sentence, NSWL = nonsocial word list, 95CI = 95% confidence interval.

**Table S11**

*ROI results of classical parametric tests in Experiment 3.*

| Stage | Contrast | Left vTPJ | | | | | Left lATL | | | | |
| --- | --- | --- | --- | --- | --- | --- | --- | --- | --- | --- | --- |
| Differences | 95CI | Cohen d | t | p | Differences | 95CI | Cohen d | t | p |
| Encoding | Social-semantic effect:  (HSHML + HSLML) - (NSHML + NSLML) | 2.21 (2.11) | [1.22, 3.20] | 1.047 | 4.682 | <.001 | 2.62 (1.99) | [1.69, 3.55] | 1.317 | 5.885 | <.001 |
|  | Memory load effect:  (HSHML + NSHML) - (HSLML + NSLML) | -1.18 (2.12) | [-2.17, -0.19] | 0.557 | -2.502 | 0.022 | 0.08 (1.20) | [-0.48, 0.64] | 0.067 | 0.309 | 0.761 |
|  | Interaction:  (HSHML - NSHML) - (HSLML - NSLML) | 0.79 (1.01) | [0.32, 1.26] | 0.782 | 3.512 | 0.002 | 0.63 (0.86) | [0.23, 1.03] | 0.733 | 3.302 | 0.004 |
| Maintenance | Social-semantic effect:  (HSHML + HSLML) - (NSHML + NSLML) | 1.04 (1.07) | [0.54, 1.54] | 0.972 | 4.346 | <.001 | 1.22 (1.35) | [0.59, 1.85] | 0.904 | 4.034 | 0.001 |
|  | Memory load effect:  (HSHML + NSHML) - (HSLML + NSLML) | -0.35 (1.90) | [-1.24, 0.54] | 0.184 | -0.816 | 0.425 | -0.20 (1.12) | [-0.72, 0.32] | 0.179 | -0.791 | 0.439 |
|  | Interaction:  (HSHML - NSHML) - (HSLML - NSLML) | 0.30 (1.09) | [-0.21, 0.81] | 0.275 | 1.239 | 0.231 | 0.30 (1.01) | [-0.17, 0.77] | 0.297 | 1.314 | 0.204 |

*Note*. Degree of freedom was 19 for all contrasts. Differences in beta values are in the form of the mean (standard deviation). Abbreviations: HSHML = high-socialness and high-memory-load, HSLML = high-socialness and low-memory-load, NSHML = nonsocial and high-memory-load, NSLML = nonsocial and low-memory-load, 95CI = 95% confidence interval.

**Table S12**

*ROI results of classical parametric tests in Experiment 5.*

| Contrast | Left vTPJ | | | | | Left lATL | | | | |
| --- | --- | --- | --- | --- | --- | --- | --- | --- | --- | --- |
| Differences | 95CI | Cohen d | t | p | Differences | 95CI | Cohen d | t | p |
| HS - SP | 0.43 (0.40) | [0.24, 0.62] | 1.075 | 4.778 | <.001 | 0.18 (0.18) | [0.10, 0.26] | 1.000 | 4.373 | <.001 |
| HS - NS | 0.80 (0.40) | [0.61, 0.99] | 2.000 | 8.921 | <.001 | 0.32 (0.24) | [0.21, 0.43] | 1.333 | 5.852 | <.001 |
| SP - NS | 0.38 (0.34) | [0.22, 0.54] | 1.118 | 4.918 | <.001 | 0.14 (0.20) | [0.05, 0.23] | 0.700 | 3.204 | 0.005 |

*Note*. Degree of freedom was 19 for all contrasts. Differences in beta values are in the form of the mean (standard deviation). Abbreviations: HS = high-socialness condition, SP = single-person condition, NS = nonsocial condition, 95CI = 95% confidence interval.

**Table S13**

*ROI results of classical parametric tests in Experiment 6.*

| Contrast | Left vTPJ | | | | | Left lATL | | | | |
| --- | --- | --- | --- | --- | --- | --- | --- | --- | --- | --- |
| Differences | 95CI | Cohen d | t | p | Differences | 95CI | Cohen d | t | p |
| RSFC to social-semantic-processing ROIs minus  RSFC to sentence-processing ROIs | 0.13 (0.19) | [0.07, 0.19] | 0.684 | 4.327 | <.001 | 0.25 (0.23) | [0.18, 0.32] | 1.087 | 6.783 | <.001 |

*Note*. Degree of freedom was 38 for all contrasts. Differences in RSFC are in the form of the mean (standard deviation), 95CI = 95% confidence interval.

## Results of the supplementary ROIs of Experiments 1 and 2

When defining the individual ROIs, we found two additional overlapping regions between the language and social masks, which were located in the dmPFC and right vTPJ. Although these regions have been found in some studies of sentence processing (Fedorenko et al., 2010; 2011), they are not viewed as classic regions of the sentence-processing network (Dronkers et al., 2004; Matchin et al., 2018; Paunov et al., 2022). Therefore, we defined these regions as two supplementary ROIs. As shown in Figure S2, we found that the sensitivity of these ROIs to sentences relied on the socialness of sentences, which is the same as in the case of the left vTPJ and lATL. Therefore, the stronger neural responses of these ROIs to sentences than to word lists do not reflect general linguistic processes but are selectively associated with social-semantic comprehension.

**Figure S2**

*Results of two supplementary individual ROIs of Experiments 1 and 2.*


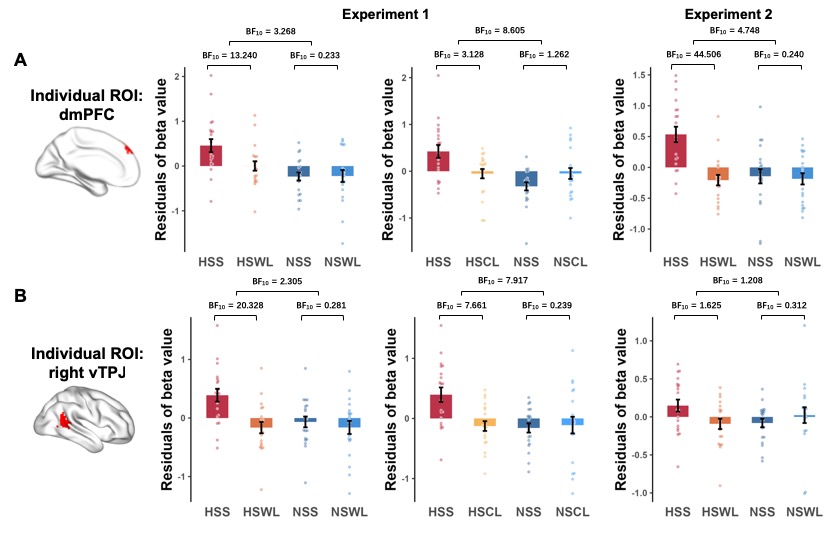


Panel A shows the results of the dmPFC, and panel B shows those of the right vTPJ. In each panel, the left and middle bar plots show the results of Experiment 1, and the right bar plot shows the results of Experiment 2. The bars show the mean residuals of the beta values with the IES being regressed out, the errorbars show standard errors, and each point shows the data of a participant. Abbreviations: HSS = high-socialness sentence, HSWL = high-socialness word list, HSCL = high-socialness character list, NSS = nonsocial sentence, NSWL = nonsocial word list, NSCL = nonsocial character list.

**Table S14**

*Classical parametric test results of two supplementary individual ROIs in Experiment 1.*

| Contrast | Individual ROI: dmPFC | | | | | Individual ROI: right vTPJ | | | | |
| --- | --- | --- | --- | --- | --- | --- | --- | --- | --- | --- |
| Differences | 95CI | Cohen d | t | p | Differences | 95CI | Cohen d | t | p |
| Social-semantic effects:  (HSS+HSWL) - (NSS+NSWL) | 0.92 (1.64) | [0.15, 1.69] | 0.561 | 2.497 | 0.022 | 0.45 (1.15) | [-0.09, 0.99] | 0.391 | 1.757 | 0.095 |
| (HSS+HSCL) - (NSS+NSCL) | 0.74 (1.33) | [0.12, 1.36] | 0.556 | 2.499 | 0.022 | 0.54 (1.00) | [0.07, 1.01] | 0.540 | 2.398 | 0.027 |
| Sentence effects:  (HSS+NSS) - (HSWL+NSWL) | 0.44 (0.83) | [0.05, 0.83] | 0.530 | 2.392 | 0.027 | 0.65 (1.03) | [0.17, 1.13] | 0.631 | 2.812 | 0.011 |
| (HSS+NSS) - (HSCL+NSCL) | 0.20 (0.97) | [-0.25, 0.65] | 0.206 | 0.922 | 0.368 | 0.48 (1.35) | [-0.15, 1.11] | 0.356 | 1.578 | 0.131 |
| Interaction:  (HSS-HSWL)-(NSS-NSWL) | 0.47 (0.80) | [0.10, 0.84] | 0.588 | 2.610 | 0.017 | 0.46 (0.85) | [0.06, 0.86] | 0.541 | 2.406 | 0.026 |
| Simple effects:  HSS-HSWL | 0.46 (0.61) | [0.17, 0.75] | 0.754 | 3.366 | 0.003 | 0.55 (0.69) | [0.23, 0.87] | 0.797 | 3.586 | 0.001 |
| NSS-NSWL | -0.01 (0.55) | [-0.27, 0.25] | 0.018 | -0.095 | 0.925 | 0.09 (0.65) | [-0.21, 0.39] | 0.138 | 0.652 | 0.522 |
| Interaction:  (HSS-HSCL) - (NSS-NSCL) | 0.75 (1.07) | [0.25, 1.25] | 0.701 | 3.140 | 0.005 | 0.57 (0.82) | [0.19, 0.95] | 0.695 | 3.096 | 0.006 |
| Simple effects:  HSS - HSCL | 0.48 (0.82) | [0.10, 0.86] | 0.585 | 2.585 | 0.018 | 0.52 (0.76) | [0.16, 0.88] | 0.684 | 3.078 | 0.006 |
| NSS - NSCL | -0.27 (0.61) | [-0.56, 0.02] | 0.443 | -2.03 | 0.057 | -0.05 (0.82) | [-0.43, 0.33] | 0.061 | -0.256 | 0.801 |

*Note*. Degree of freedom was 19 for all contrasts. Differences in residuals of beta value are in the form of mean (standard deviation). Abbreviations: HSS = high-socialness sentence, HSWL = high-socialness word list, HSCL = high-socialness character list, NSS = nonsocial sentence, NSWL = nonsocial word list, NSCL = nonsocial character list, 95CI = 95% confidence interval.

**Table S15**

*Classical parametric test results of two supplementary individual ROIs in Experiment 2.*

| Contrast | Individual ROI: dmPFC | | | | | Individual ROI: right vTPJ | | | | |
| --- | --- | --- | --- | --- | --- | --- | --- | --- | --- | --- |
| Differences | 95CI | Cohen d | t | p | Differences | 95CI | Cohen d | t | p |
| Social-semantic effect:  (HSS+HSWL) - (NSS+NSWL) | 0.66 (1.08) | [0.15, 1.17] | 0.611 | 2.725 | 0.013 | 0.11 (0.88) | [-0.30, 0.52] | 0.125 | 0.582 | 0.567 |
| Sentence effect:  (HSS+NSS) - (HSWL+NSWL) | 0.78 (1.04) | [0.29, 1.27] | 0.750 | 3.384 | 0.003 | 0.14 (0.74) | [-0.21, 0.49] | 0.189 | 0.827 | 0.418 |
| Interaction:  (HSS-HSWL)-(NSS-NSWL) | 0.70 (1.11) | [0.18, 1.22] | 0.631 | 2.819 | 0.011 | 0.34 (0.77) | [-0.02, 0.70] | 0.442 | 2.001 | 0.060 |
| Simple effects:  HSS-HSWL | 0.74 (0.83) | [0.35, 1.13] | 0.892 | 3.982 | 0.001 | 0.24 (0.49) | [0.01, 0.47] | 0.490 | 2.193 | 0.041 |
| NSS-NSWL | 0.04 (0.68) | [-0.28, 0.36] | 0.059 | 0.275 | 0.786 | -0.10 (0.57) | [-0.37, 0.17] | 0.175 | -0.812 | 0.427 |

*Note*. Degree of freedom was 19 for all contrasts. Differences in residuals of beta value are in the form of mean (standard deviation). Abbreviations: HSS = high-socialness sentence, HSWL = high-socialness word list, NSS = nonsocial sentence, NSWL = nonsocial word list, 95CI = 95% confidence interval.

# Section B: Manipulated and controlled variables of Experiments 1, 2, and 3

**Table S16**

*Manipulated and controlled variables of Experiment 1.*

| Variables | High-social  sentence | Nonsocial  sentence | High-social vs. Nonsocial | |
| --- | --- | --- | --- | --- |
|  |  |  | *t* | *p* |
| Log-transformed frequency of the first word | 0.89 (0.38) | 0.82 (0.26) | 0.798 | .426 |
| Log-transformed frequency of the second word | 0.68 (0.37) | 0.72 (0.41) | 0.447 | .656 |
| Log-transformed frequency of the third word | 0.75 (0.34) | 0.75 (0.25) | 0.090 | .928 |
| Socialness of the first word | 5.61 (0.3) | 2.14 (0.23) | 46.782 | < .001 |
| Socialness of the second word | 5.28 (0.29) | 2.9 (0.32) | 29.873 | < .001 |
| Socialness of the third word | 5.38 (0.39) | 2.23 (0.35) | 36.044 | < .001 |
| Semantic familiarity of the sentence | 5.13 (0.82) | 5.26 (0.55) | 1.133 | .259 |
| Semantic plausibility of the sentence | 6.50 (0.23) | 6.44 (0.19) | 0.887 | .376 |
| Socialness of the sentence | 6.00 (0.09) | 1.51 (0.25) | 75.518 | < .001 |
| Imageability of the sentence | 4.77 (0.68) | 4.93 (2.41) | 0.907 | .366 |

*Note.* The variables are presented as the mean (standard deviation).

**Table S17**

*Manipulated and controlled variables of Experiment 2.*

| Variables | High-social  sentence | Nonsocial  sentence | High-social vs. Nonsocial | |
| --- | --- | --- | --- | --- |
|  |  |  | *t* | *p* |
| Socialness of the sentence | 5.64 (0.73) | 1.01 (0.04) | 49.300 | < .001 |
| Syntactic plausibility of the sentence | 6.69 (0.35) | 6.75 (0.14) | 1.125 | .214 |
| Semantic plausibility of the sentence | 6.75 (0.30) | 6.67 (0.31) | 1.518 | .132 |
| Semantic familiarity of the sentence | 6.70 (0.12) | 6.68 (0.10) | 1.256 | .212 |
| Imageability of the sentence | 4.55 (0.83) | 4.79 (1.13) | 1.337 | .184 |
| Maximum depth of the syntactic nodes | 5.67 (0.80) | 5.50 (0.68) | 1.236 | .219 |
| Mean depth of the syntactic nodes | 2.34 (0.21) | 2.34 (0.21) | 0.014 | .989 |
| Character number per sentence | 13.37 (0.86) | 13.33 (1.00) | 0.195 | .846 |
| Word number of per sentence | 7.97 (0.99) | 8.12 (1.03) | 0.814 | .417 |
| Averaged log-transformed word frequency per sentence | 2.24 (0.40) | 2.16 (0.23) | 1.341 | .182 |

*Note*. The variables are presented as the mean (standard deviation).

**Table S18**

*Manipulated and controlled variables of Experiment 3.*

| Variables | Conditions | | | | (HSHML + HSLML) > (NSHML + NSLML) | | (HSHML + NSHML) > (HSLML + NSLML) | |
| --- | --- | --- | --- | --- | --- | --- | --- | --- |
|  | HSHML | HSLML | NSHML | NSLML | *t* | *p* | *t* | *p* |
| Log-transformed frequency of the first word | 0.9 (0.62) | 0.86 (0.62) | 0.88 (0.52) | 0.71 (0.48) | 0.798 | .426 | 0.699 | .486 |
| Log-transformed frequency of the second word | 0.64 (0.58) | 0.74 (0.65) | 0.74 (0.67) | 0.66 (0.58) | 0.447 | .656 | 0.104 | .918 |
| Log-transformed frequency of the third word | 0.78 (0.55) | 0.69 (0.64) | 0.77 (0.49) | 0.71 (0.52) | 0.090 | .928 | 0.676 | .500 |
| Socialness of the first word | 5.6 (0.58) | 5.65 (0.48) | 2.17 (0.53) | 2.08 (0.33) | 46.782 | < .001 | 0.214 | .831 |
| Socialness of the second word | 5.25 (0.57) | 5.35 (0.48) | 2.92 (0.56) | 2.85 (0.58) | 29.873 | < .001 | 0.515 | .607 |
| Socialness of the third word | 5.33 (0.63) | 5.47 (0.61) | 2.22 (0.62) | 2.24 (0.51) | 36.044 | < .001 | 0.028 | .978 |
| Semantic plausibility of the sentence | 6.48 (0.51) | 6.54 (0.43) | 6.42 (0.44) | 6.48 (0.41) | 0.887 | .376 | 1.889 | .061 |
| Socialness of the sentence | 6.01 (0.31) | 5.98 (0.29) | 1.53 (0.49) | 1.48 (0.51) | 75.518 | < .001 | .031 | .976 |
| Imageability of the sentence | 4.78 (0.84) | 4.76 (0.79) | 4.86 (1.58) | 5.09 (1.49) | 0.907 | .366 | 0.046 | .963 |
| Semantic familiarity of the sentence | 5.10 (0.94) | 5.20 (0.83) | 5.22 (0.78) | 5.35 (0.65) | 1.133 | .259 | 0.419 | .676 |

*Note*. The variables are presented as the mean (standard deviation).

# Section C: Behavioral Results of Experiments 1 to 5

### Methods

Behavioral data of Experiment 1, 2, and 3 were analyzed using the same procedure. In each experiment, for each participant and each condition, we first removed the reaction time (RT) measures that either corresponded to incorrect responses or were three SDs from the mean. To analyze the RTs, we fitted a linear mixed model to raw RT data using the lme4 package in R. The model included following fixed effects: for Experiment 1, socialness (high-socialness, nonsocial), linguistic hierarchies (sentence, word list, character-list), and their interactions; for Experiment 2, socialness, linguistic hierarchies (sentence, word list), and their interactions; for Experiment 3, socialness, memory load (high, low), and their interactions. The participant and trial were included as random factors. A maximum model was built first, in which random effects on participant included random intercept and all fixed effects, while random effects on trial included only random intercept. When the maximal model failed to converge, we used a zero-correlation parameter model and dropped the random components that generated the smallest variances (Bates et al., 2015). Statistical significances of fixed effects were assessed via Satterthwaite approximation for degrees of freedom from the lmerTest R package (Kuznetsova et al. 2017). For experiment 1, the corresponding *F*-values and *p*-values were reported, while for Experiment 2 and 3, the corresponding *t*-values and *p*-values were reported. For accuracy, we fitted a generalized linear mixed model with a binary distribution. For the fixed and random effects, the model was built in the same manner as in the analysis of the RTs. Statistical significance of the fixed effects was assessed via Wald tests for Experiment 1, and via Satterthwaite approximation for degrees of freedom for Experiment 2 and 3. Corresponding -values, *z*-values and *p*-values were reported.

For Experiment 4, because there was no absolute correct answer for the ‘mental portrait’ task, we calculated the intersubject correlation (ISC) of participants’ responses for each condition. We separated the participants into four groups, with each group having completed an identical set of trials during the fMRI scan. In each group, ISCs in trait and physical facial conditions were calculated between each pair of participants using Equations 1, 2 and 3, where Si and Sj were the responses of the *i*th and *j*th participants, was the number of the same responses between these two participants, n was the number of all responses for one participant, D was the absolute value of ISC, and Sign was the direction of ISC.

(1)

(2)

(3)

In each condition, the resulting ISCs were Fisher-transformed and then averaged. Null hypothesis significance testing was used to compare the averaged ISCs against chance. This was achieved via a permutation testing procedure. Specifically, for each condition, the responses of each participant were repeatedly (5000 times) randomly disrupted. On each occasion, we computed the permuted averaged “ISCs”. These permuted ISCs formed empirical null distributions. We compared the actual ISCs against the empirical null distribution to compute the probability that the actual ISC was consistent with a chance ISC rate.

For Experiment 5, we removed the trials with no response. To analyze the rating scores, we fitted a generalized linear mixed model with a poisson distribution using the lme4 package in R. The model included fixed effects for experimental conditions (HS, SP, NS), with participant included as the random factor. A maximum model was built, in which random effects included random intercept and all fixed effects. Wald chi-square tests were adopted to assess statistical significance of the fixed effects, and corresponding *chi-square*-values and *p*-values were reported.

### Results

***Experiment 1***

The RT and accuracy for different conditions are reported in Table S19. Linguistic hierarchies (i.e. sentence, word list, and character list) had a significant effect on RT (*F* = 7.273, *p* <.001). We conducted post hoc tests between each pair of hierarchies using Bonferroni correction to control for multiple comparisons. RT was longer in the character-list conditions than in the word-list (*t* = 3.688, *pcorrected* <.001) and sentence (*t* = 2.48, *pcorrected* =.047) conditions, and there was no significant difference between the word-list and sentence conditions. The effects of the other predictors on RT were nonsignificant (for socialness, *F* = 1.533, *p* =.222; for interaction, *F* = 0.059, *p* =.949). Linguistic hierarchies also had a significant effect on accuracy ( = 12.988, *p* =.002). Post hoc tests showed higher accuracies for sentences (*z* = 3.539, *pcorrected* =.001) and word lists (*z* = 2.367, *pcorrected* =.054) than for character lists, and there was no significant difference between the word-list and sentence conditions. The effect of socialness was also significant ( = 4.224, *p* =.040), with higher accuracies for social conditions. The interaction effect on accuracies was not significant ( = 0.829, *p* =.661). The possible reasons for the lack of significant difference between the sentence and word-list conditions are that the length of the stimuli was short and the presentation rate of stimuli was relatively slow (500 milliseconds per word).

**Table S19**

*Behavioral results of Experiment 1.*

| Condition | Reaction time (ms) | Accuracy |
| --- | --- | --- |
| HSS | 685 (53) | 91.3% (6.5%) |
| HSWL | 682 (72) | 89.9% (8.7%) |
| HSCL | 706 (82) | 86.1% (9.7%) |
| NSS | 695 (66) | 88.5% (6.7%) |
| NSWL | 687 (63) | 87.7% (7.0%) |
| NSCL | 712 (66) | 85.4% (9.8%) |

*Note*. The variables are presented as the mean (standard deviation). Condition labels: HSS = high-socialness sentence, HSWL = high-socialness word list, HSCL = high-socialness character list, NSS = nonsocial sentence, NSWL = nonsocial word list, NSCL = nonsocial character list.

***Experiment 2***

The RT and accuracy for different conditions are reported in Table S20. Linguistic hierarchies (i.e. sentence and word list) had a marginally significant effect on RT (*t* = -1.940, *p* =.056), with shorter RT for the sentence conditions. The effects of socialness (*t* = -0.098, *p* =.922) and interaction (*t* = -0.252, *p* =.801) were not significant. Linguistic hierarchies had a significant effect on accuracy (*z* = 4.164, *p* <.001), with higher accuracy for the sentence conditions. The effects of socialness (*z* = 1.257, *p* =.209) and interaction (*z* = -0.688, *p* =.492) were not significant.

**Table S20**

*Behavioral results of Experiment 2.*

| Condition | Reaction time (ms) | Accuracy |
| --- | --- | --- |
| HSS | 671 (75) | 95.8% (6.4%) |
| HSWL | 690 (84) | 92.8% (7.7%) |
| NSS | 675 (75) | 95.5% (6.6%) |
| NSWL | 689 (71) | 90.9% (6.9%) |

*Note*. The variables are presented as the mean (standard deviation). Condition labels: HSS = high-socialness sentence, HSWL = high-socialness word list, NSS = nonsocial sentence, NSWL = nonsocial word list.

***Experiment 3***

The RT and accuracy for different conditions are reported in Table S21. Memory load had a significant effect on RT (*t* = 5.618, *p* <.001), with longer RT for high demand conditions. The effects of socialness (*t* = 0.443, *p* =.659) and interaction (*t* = 0.319, *p* =.750) were not significant. Memory load also had a significant effect on accuracy (*z* = -7.133, *p* <.001), with higher accuracy for low-memory-load conditions. The effects of social-semantic-richness (*z* = 0.950, *p* =.342) and interaction (*z* = 0.352, *p* =.725) were not significant.

**Table S21**

*Behavioral results of Experiment 3.*

| Condition | Reaction time (ms) | Accuracy |
| --- | --- | --- |
| HSHML | 1376 (484) | 80.5% (11.0%) |
| HSLML | 1203 (419) | 93.3% (8.0%) |
| NSHML | 1349 (428) | 77.0% (12.2%) |
| NSLML | 1200 (402) | 92.7% (7.3%) |

*Note*. The variables are presented as the mean (standard deviation). Condition labels: HSHML = high-socialness and high-memory-load, HSLML = high-socialness and low-memory-load, NSHML = nonsocial and high-memory-load, NSLML = nonsocial and low-memory-load.

***Experiment 4***

ISCs (Fisher transformed) were 0.014 for trait conditions and 0.147 for physical facial conditions. The permutation test showed that the 99.9% confidence intervals of chance level were [-0.012, 0.007] for trait conditions and [-0.011, 0.009] for physical facial conditions. Therefore, both ISCs were higher than chance levels (*p*s <.001).

***Experiment 5***

The results of the pleasantness rating are reported in Table S22. Statistical analysis showed that there were significant differences among the three conditions in rating scores ( = 38.148, *p* <.001). Post hoc tests showed that rating scores in the NS condition were higher than those in the HS (z = 4.142, *pcorrected* <.001) and SP conditions (*z* = 5.481, *pcorrected* <.001).

**Table S22**

*Behavioral results of Experiment 5.*

| Condition | Pleasantness rating score |
| --- | --- |
| HS | 2.84 (0.37) |
| SP | 2.72 (0.30) |
| NP | 3.33 (0.31) |

*Note*. The variables are presented as the mean (standard deviation). Condition labels: HS = high-socialness condition, SP = single-person condition, NS = nonsocial condition.

# Reference

Bates, D., Kliegl, R., Vasishth, S., & Baayen, H. (2015). Parsimonious mixed models. arXiv preprint arXiv:1506.04967.

Dronkers, N. F., Wilkins, D. P., Van Valin Jr, R. D., Redfern, B. B., & Jaeger, J. J. (2004). Lesion analysis of the brain areas involved in language comprehension. *Cognition*, *92*(1-2), 145–177.

Fedorenko, E., Behr, M. K., & Kanwisher, N. (2011). Functional specificity for high-level linguistic processing in the human brain. *Proceedings of the National Academy of Sciences*, *108*(39), 16428–16433.

Fedorenko, E., Hsieh, P. J., Nieto-Castañón, A., Whitfield-Gabrieli, S., & Kanwisher, N. (2010). New method for fMRI investigations of language: defining ROIs functionally in individual subjects. *Journal of Neurophysiology*, *104*(2), 1177–1194.

Matchin, W., Brodbeck, C., Hammerly, C., & Lau, E. (2019). The temporal dynamics of structure and content in sentence comprehension: Evidence from fMRI-constrained MEG. *Human Brain Mapping*, *40*(2), 663–678.

Kuznetsova A, Brockhoff PB, Christensen RHB (2017) lmerTest Package: Tests in Linear Mixed Effects Models. *Journal of Statistical Software*, 82 (13), 1–26.

Paunov, A., Blank, I., Jouravlev, O., Mineroff, Z., Gallée, J., & Fedorenko, E. (2022). Differential tracking of linguistic vs. mental state content in naturalistic stimuli by language and Theory of Mind (ToM) brain networks. *Neurobiology of Language,* *3*(3), 413–440.

Zaccarella, E., Schell, M., & Friederici, A. D. (2017). Reviewing the functional basis of the syntactic Merge mechanism for language: A coordinate-based activation likelihood estimation meta-analysis. *Neuroscience & Biobehavioral Reviews*, *80*, 646–656.
